# Supplementary material for: Expression and relationship of PD-L1, CD24, and CD47 in hepatitis B virus associated hepatocellular carcinoma
Source: PubMed Central journal article supplement — Sci Rep. 2024 Dec 28;14:31530. doi: 10.1038/s41598-024-83145-5 (PMC11682133; doi:10.1038/s41598-024-83145-5), 2024-12-28
Supplement: 41598_2024_83145_MOESM1_ESM.pdf [file 41598_2024_83145_MOESM1_ESM.pdf]

Expression and Relationship of PD-L1, CD24, and CD47 in Hepatitis B Virus Associated Hepatocellular Carcinoma

Aiping Lin <sup>1#</sup>, Mingxia Wang <sup>2#</sup>, Zhihui Wang <sup>3#</sup>, Juan Lin <sup>4</sup>, Zhihui Lin <sup>1</sup>, Shaowei Lin <sup>5</sup>, Shiyun Lu <sup>1</sup>, Hong Lin <sup>1</sup>, Haijun Tang <sup>6\*</sup>, Xueping Huang <sup>1\*</sup>

**Supplementary Table S1. Univariate analysis of prognostic factors in HBV-associated HCC**

| Factors                            | P (OS) | HR (OS) | 95%CI (OS)   | P (PFS) | HR (PFS) | 95%CI (PFS)  |
|------------------------------------|--------|---------|--------------|---------|----------|--------------|
| Gender                             | 0.401  | 0.686   | 0.285-1.653  | 0.560   | 0.771    | 0.321-1.851  |
| Age                                | 0.558  | 1.008   | 0.981-1.036  | 0.667   | 1.007    | 0.976-1.039  |
| Smoking                            | 0.018  | 2.208   | 0.218-1.829  | 0.003   | 2.732    | 1.394-5.353  |
| Drinking                           | 0.254  | 1.595   | 0.716-3.556  | 0.248   | 1.602    | 0.721-3.560  |
| Child-Pugh grade                   | 0.072  | 3.044   | 0.904-10.249 | 0.256   | 1.995    | 0.607-6.559  |
| Number of tumors                   | 0.000  | 9.738   | 2.743-34.572 | 0.000   | 12.568   | 3.302-47.831 |
| Invasion of the liver capsule      | 0.321  | 0.698   | 0.342-1.421  | 0.801   | 0.913    | 0.450-1.854  |
| Histopathological grading          | 0.272  | 1.962   | 0.589-6.530  | 0.418   | 1.655    | 0.489-5.601  |
| TNM stage                          | 0.006  | 2.927   | 1.370-6.256  | 0.001   | 3.937    | 1.776-8.728  |
| Postoperative treatment modalities | 0.454  | 1.278   | 1.144-4.260  | 0.487   | 1.254    | 0.662-2.376  |
| PD-L1                              | 0.018  | 2.589   | 1.175-5.707  | 0.021   | 2.456    | 1.150-5.637  |
| CD24                               | 0.029  | 2.074   | 1.078-3.992  | 0.015   | 2.258    | 1.175-4.340  |
| CD47                               | 0.343  | 0.696   | 0.329-1.472  | 0.384   | 0.719    | 0.342-1.511  |
| AFP                                | 0.551  | 1.000   | 1.000-1.000  | 0.549   | 1.000    | 1.000-1.000  |
| CEA                                | 0.040  | 1.198   | 1.008-1.423  | 0.131   | 1.143    | 0.961-1.359  |
| CA199                              | 0.018  | 1.010   | 1.002-1.019  | 0.025   | 1.010    | 1.001-1.018  |

|                                      |       |       |             |       |       |             |
|--------------------------------------|-------|-------|-------------|-------|-------|-------------|
| ALT                                  | 0.452 | 0.999 | 0.995-1.002 | 0.971 | 1.000 | 0.996-1.004 |
| AST                                  | 0.958 | 1.000 | 0.995-1.004 | 0.538 | 1.001 | 0.997-1.006 |
| ALB                                  | 0.084 | 0.955 | 0.906-1.006 | 0.049 | 0.946 | 0.896-1.000 |
| TBIL                                 | 0.138 | 1.028 | 0.991-1.066 | 0.149 | 1.027 | 0.990-1.065 |
| RGT                                  | 0.097 | 1.002 | 1.000-1.003 | 0.019 | 1.002 | 1.000-1.004 |
| PT                                   | 0.595 | 1.064 | 0.847-1.336 | 0.525 | 1.066 | 0.875-1.300 |
| WBC                                  | 0.462 | 1.044 | 0.930-1.172 | 0.209 | 1.079 | 0.958-1.215 |
| PLT                                  | 0.506 | 0.999 | 0.996-1.002 | 0.347 | 0.998 | 0.995-1.002 |
| Hb                                   | 0.300 | 0.990 | 0.971-1.009 | 0.097 | 0.982 | 0.962-1.003 |
| Maximum diameter of primary<br>tumor | 0.001 | 1.112 | 1.044-1.185 | 0.001 | 1.118 | 1.048-1.192 |

OS: Overall survival; PFS: Progression-free survival.

**Supplementary Table S2. Correlation between CD47 expression and clinicopathological factors in HBV-associated HCC**

| Factors                                          | N  | CD47                  |                        | P     | Spearman correlation coefficient |
|--------------------------------------------------|----|-----------------------|------------------------|-------|----------------------------------|
|                                                  |    | Low expression (n=18) | High expression (n=49) |       |                                  |
| TNM stage (%)                                    |    |                       |                        | 0.950 |                                  |
| I                                                | 33 | 10 (55.5)             | 23 (46.9)              |       |                                  |
| II                                               | 22 | 5 (27.8)              | 17 (34.7)              |       |                                  |
| III                                              | 11 | 3 (16.7)              | 8 (16.3)               |       |                                  |
| IV                                               | 1  | 0 (0.0)               | 1 (2.0)                |       |                                  |
| Histopathological grading (%)                    |    |                       |                        | 0.320 |                                  |
| Low                                              | 13 | 3 (16.7)              | 10 (20.4)              |       |                                  |
| Intermediate                                     | 49 | 15 (83.3)             | 34(69.4)               |       |                                  |
| High                                             | 5  | 0 (0.0)               | 5 (10.2)               |       |                                  |
| Number of tumors (%)                             |    |                       |                        | 0.224 |                                  |
| 1                                                | 57 | 15 (83.3)             | 42 (85.7)              |       |                                  |
| 2                                                | 7  | 1 (5.6)               | 6 (12.2)               |       |                                  |
| >2                                               | 3  | 2 (11.1)              | 1 (2.0)                |       |                                  |
| Maximum diameter of primary tumor (cm) (mean±SD) | 67 | 6.90±5.38             | 7.25±4.44              | 0.787 |                                  |
| CK19                                             | 67 | 0.06±0.24             | 0.63±1.93              | 0.282 |                                  |

|            |    |               |               |       |        |
|------------|----|---------------|---------------|-------|--------|
| (mean±SD)  |    |               |               |       |        |
| CK18       |    |               |               |       |        |
|            | 67 | 4.44±4.03     | 5.29±4.17     | 0.463 |        |
| (mean±SD)  |    |               |               |       |        |
| CD34       |    |               |               |       |        |
|            | 67 | 1.56±2.33     | 3.37±3.92     | 0.025 | -0.037 |
| (mean±SD)  |    |               |               |       |        |
| Glypican-3 |    |               |               |       |        |
|            | 67 | 4.72±3.74     | 3.67±3.97     | 0.334 |        |
| (mean±SD)  |    |               |               |       |        |
| Hepar-1    |    |               |               |       |        |
|            | 67 | 1.11±2.35     | 2.47±3.61     | 0.079 |        |
| (mean±SD)  |    |               |               |       |        |
| Ki67 (%)   |    |               |               |       |        |
|            | 67 | 28.61%±18.85% | 26.94%±22.64% | 0.781 |        |
| (mean±SD)  |    |               |               |       |        |

---

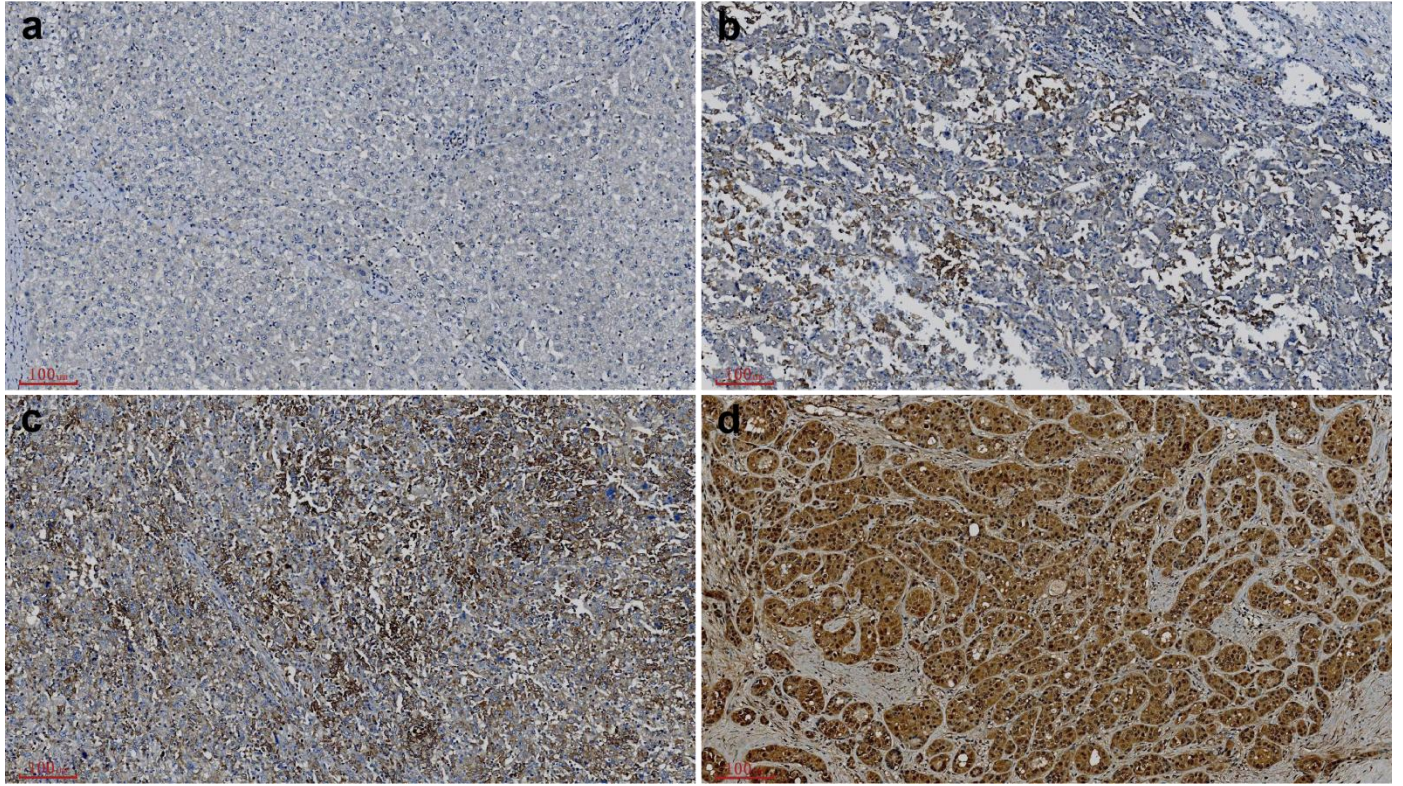

**Fig. S1** Immunohistochemical study of PD-L1 expression in hepatocellular carcinoma tissues. The intensity of membranous staining was graded as negative (**a**), weak (**b**), intermediate (**c**), or strong (**d**) (a-d,  $\times 100$ ).



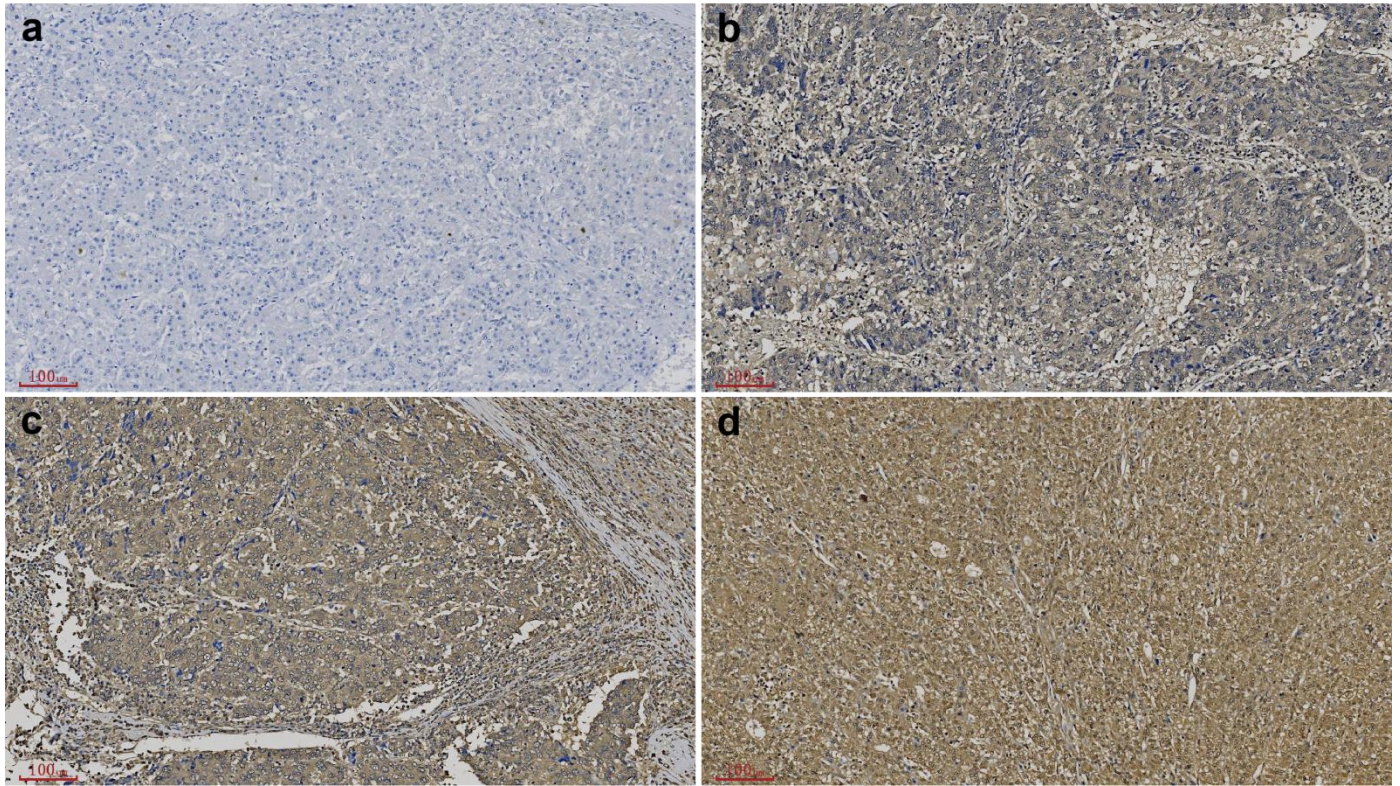

**Fig. S2** Immunohistochemical study of CD24 expression in hepatocellular carcinoma tissues. The intensity of membranous staining was graded as negative (**a**), weak (**b**), intermediate (**c**), or strong (**d**) (a-d,  $\times 100$ ).



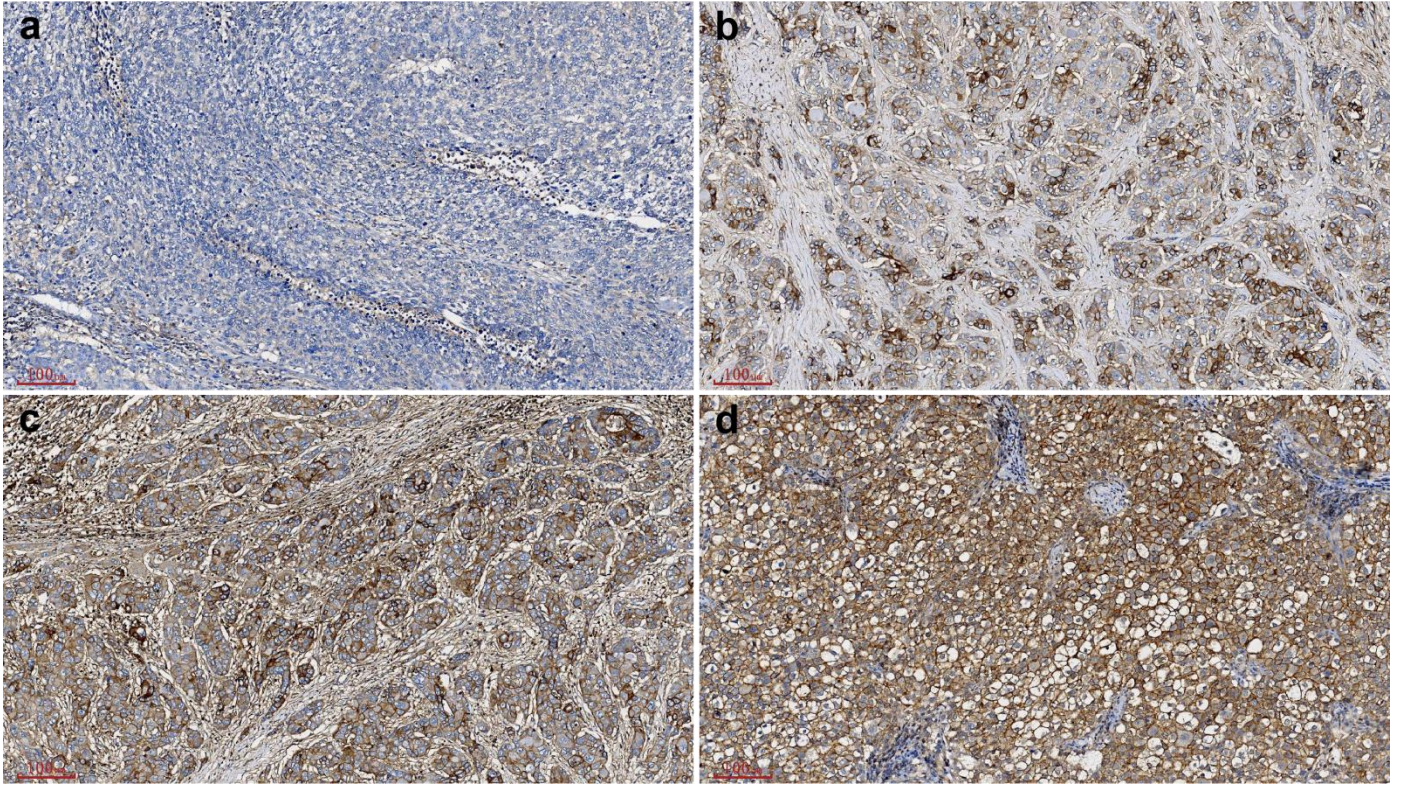

**Fig. S3** Immunohistochemical study of CD47 expression in hepatocellular carcinoma tissues. The intensity of membranous staining was graded as negative (**a**), weak (**b**), intermediate (**c**), or strong (**d**) (a-d,  $\times 100$ ).
